# Supplementary material
Source: Springer Nature journal article supplement (https://www.springermedizin.de/resource/supplementary/12871_2013_173_MOESM1_ESM.pdf/9428984)

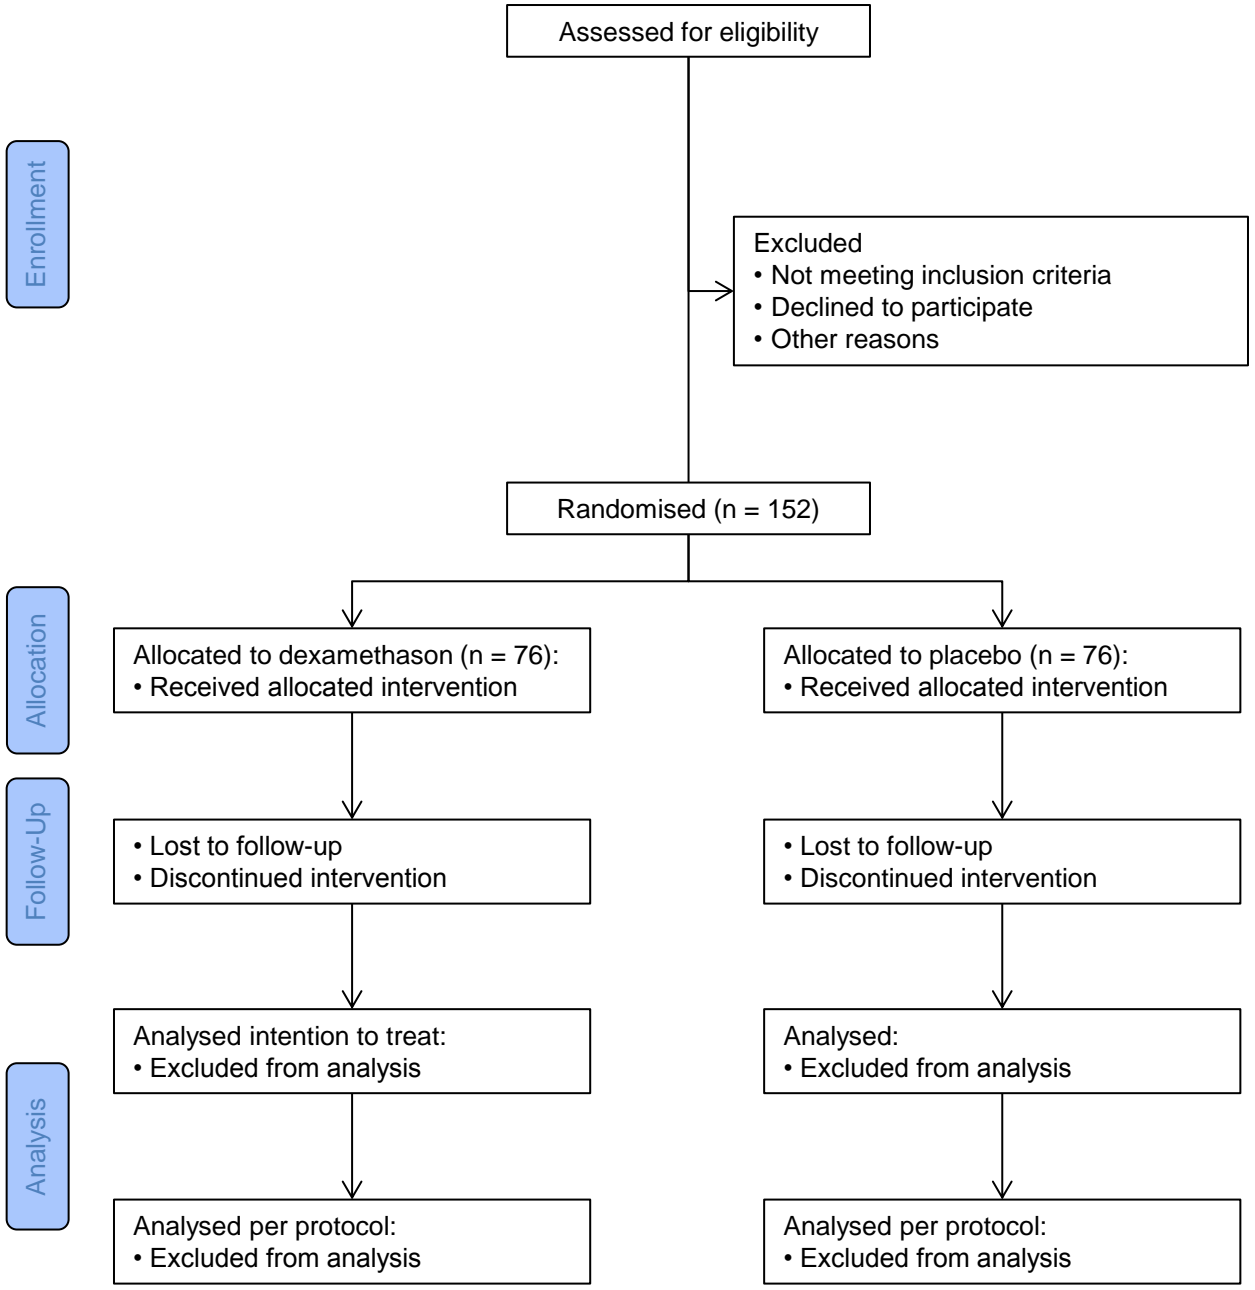

Supplement: MOESM1 [file 9428984]
